# Supplementary material
Source: publisher figshare collection journal article supplement (https://tandf.figshare.com/ndownloader/files/13459886)
Supplement: Supplementary file 1 [file 13459886]

Supplementary Figure 1. Flowchart of participation in Health 2000 and 2011

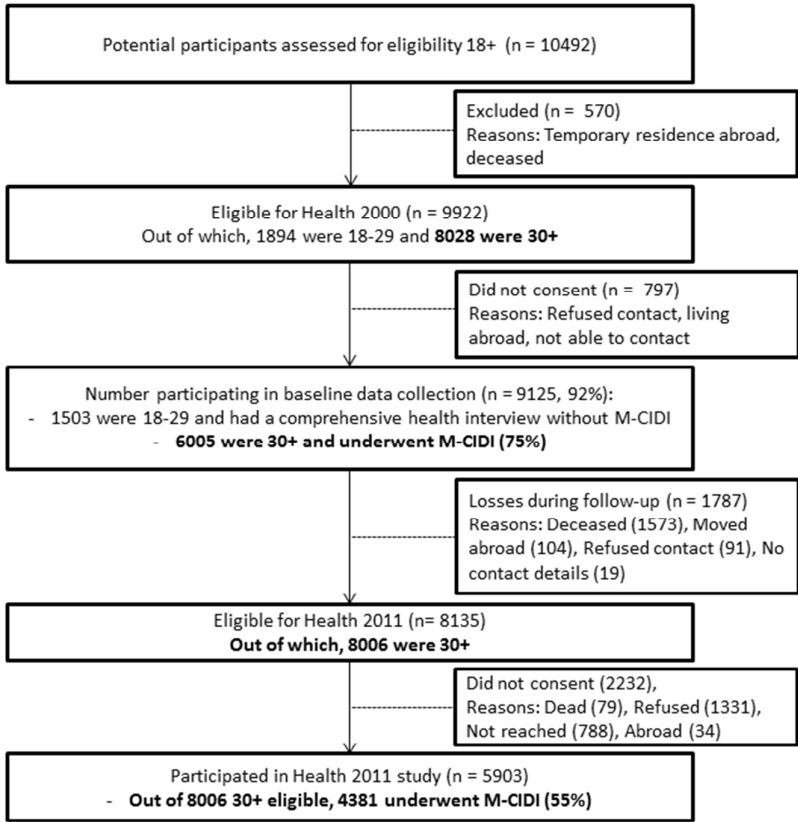

**Supplementary Table 1.** Description of variables used in multiple imputation

| Number                                   | Variable in year 2000            | Definition                                                                                                          |
|------------------------------------------|----------------------------------|---------------------------------------------------------------------------------------------------------------------|
| <b>Socioeconomic status</b>              |                                  |                                                                                                                     |
| 1                                        | Female                           | Female = 1                                                                                                          |
| 2                                        | Years of education               | Number of years of education                                                                                        |
| 3                                        | Education                        | Basic, intermediate and high                                                                                        |
| 4                                        | Married or living with a partner | Married or living w/ partner=1 (Divorced, single or widow; 0)                                                       |
| 5                                        | Civil status                     |                                                                                                                     |
| 6                                        | Household size                   | Number of people living in the household                                                                            |
| 7                                        | Been unemployed                  | Been unemployed or laid off in the last 5 years                                                                     |
| 8                                        | Working last 12 months           | Have been working in the past 12 months                                                                             |
| 9                                        | Income                           | Less than 1000 FIM monthly family income with taxes (1/4=1; 0)                                                      |
| <b>Health status and use of services</b> |                                  |                                                                                                                     |
| 10                                       | Self-perceived health            | Poor or rather poor=1                                                                                               |
| 11                                       | Permanent or chronic illness     | Self-reported permanent or chronic illness, trouble or injury that reduces working capacity and functional capacity |
| 12                                       | Mental disorder                  | Has a doctor ever diagnosed you with a mental disorder?                                                             |
| 13                                       | Visit to a doctor last 12m       | Have you seen a doctor in the last 12 months?                                                                       |
| 14                                       | Use of mental health services    | Have you used any health service due to mental problems?                                                            |
| 15                                       | Use of prescribed medicine       | Have you used at least once a medicine prescribed by a doctor in the last 12 months?                                |
| <b>Health behaviours</b>                 |                                  |                                                                                                                     |
| 16                                       | Current smoking                  | Do you smoke nowadays?                                                                                              |
| 17                                       | Self-perceived health 2          | Indicate your health today from 1 to 10: value =<4 (out of 10)                                                      |
| 18                                       | Quality of life                  | How to you see your quality of life in the past 30 days: value =< 4 (out of 10)                                     |

|                             |                                                                  |                                                                                                       |
|-----------------------------|------------------------------------------------------------------|-------------------------------------------------------------------------------------------------------|
| 19                          | Physical activity                                                | Minimum of 4 times/wk of sports in free time                                                          |
| 20                          | Hangover last year                                               | Once or more walking up with hangover during the past 12 months                                       |
| 21                          | Use of services because of alcohol                               | Use of health or social services because of alcohol problems                                          |
| 22                          | Current or past use of alcohol                                   | Has drunk in the past or now (2/3=1); 0)                                                              |
| 23                          | Abstinence last 12 months                                        | Has drunk in the last 12 months (1/9=1); 0)                                                           |
| 24                          | Grams per year                                                   | Total alcohol consumption in grams per year                                                           |
| 25                          | Abuse year 2000                                                  | CIDI diagnosis of abuse, year 2000                                                                    |
| 26                          | Dependence year 2000                                             | CIDI diagnosis of dependence, year 2000                                                               |
| 27                          | Abuse year 2011                                                  | CIDI diagnosis of abuse, year 2011                                                                    |
| 28                          | Dependence year 2011                                             | CIDI diagnosis of dependence, year 2011                                                               |
| <b>Hospitals admissions</b> |                                                                  |                                                                                                       |
| 29                          | Registry: Any psychiatric disorder lifetime until year 2000      | Hospital admission for any psychiatric disorder lifetime until year 2000. ICD-10: F04-F99             |
| 30                          | Registry: Any psychiatric disorder lifetime until year 2011      | Hospital admission for any psychiatric disorder lifetime until year 2011. ICD-10: F04-F99             |
| 31                          | Registry: Alcohol dependence lifetime until year 2000            | Hospital admission for alcohol dependence lifetime until year 2000. ICD-10: F10                       |
| 32                          | Registry: Alcohol dependence lifetime until year 2011            | Hospital admission for alcohol dependence lifetime until year 2011. ICD-10: F10                       |
| 33                          | Registry: Dementia lifetime until year 2000                      | Hospital admission for dementia lifetime until year 2000. ICD-10: F00-F03                             |
| 34                          | Registry: Dementia lifetime until year 2011                      | Hospital admission for dementia lifetime until year 2011. ICD-10: F00-F03                             |
| 35                          | Registry: Other non-affective psychosis lifetime until year 2000 | Hospital admission for other non-affective psychosis lifetime until year 2000. ICD-10: F22-25, F28-29 |
| 36                          | Registry: Other non-affective psychosis lifetime until year 2011 | Hospital admission for other non-affective psychosis lifetime until year 2011. ICD-10: F22-25, F28-29 |
| 37                          | Registry: Depressive disorders lifetime until year 2000          | Hospital admission for depressive disorder lifetime until year 2000. ICD-10: F32-33, F341             |
| 38                          | Registry: Depressive disorders lifetime until year 2011          | Hospital admission for depressive disorder lifetime until year 2011. ICD-10: F32-33, F341             |
| 39                          | Registry: Schizophrenia lifetime until year 2000                 | Hospital admission for schizophrenia lifetime until year 2000. ICD-10: F20                            |
| 40                          | Registry: Schizophrenia lifetime until year 2011                 | Hospital admission for schizophrenia lifetime until year 2011. ICD-10: F20                            |

Registry: Anxiety disorders lifetime  
41 until year 2011      Hospital admissions for anxiety disorders lifetime until year 2011. ICD-10: F40-42, F430, F431

For Peer Review Only

**Supplementary Table 2.** Alcohol dependence hospital admissions and participation in the Health 2011 Survey by gender and age group

| Gender  | Age group | Participation in Health 2011 | Hospitalization alcohol dependence lifetime until 2011% | Hospitalization alcohol dependence last 5 years % |
|---------|-----------|------------------------------|---------------------------------------------------------|---------------------------------------------------|
| Males   | 30-45     | No                           | 5.5                                                     | 3                                                 |
|         |           | Yes                          | 1.7                                                     | 1.1                                               |
|         | 45-55     | No                           | 5.9                                                     | 3.8                                               |
|         |           | Yes                          | 4.3                                                     | 3.2                                               |
|         | 55-65     | No                           | 11.8                                                    | 7.7                                               |
|         |           | Yes                          | 4.3                                                     | 1.7                                               |
|         | 65-75     | No                           | 12.7                                                    | 4.5                                               |
|         |           | Yes                          | 4.1                                                     | 0.9                                               |
|         | 75+       | No                           | 6.5                                                     | 2.2                                               |
|         |           | Yes                          | 2                                                       | 0.4                                               |
| Females | 30-45     | No                           | 2                                                       | 1.6                                               |
|         |           | Yes                          | 0.7                                                     | 0.6                                               |
|         | 45-55     | No                           | 1.1                                                     | 0                                                 |
|         |           | Yes                          | 1.8                                                     | 0.9                                               |
|         | 55-65     | No                           | 4                                                       | 1.3                                               |
|         |           | Yes                          | 0.7                                                     | 0.1                                               |
|         | 65-75     | No                           | 1.8                                                     | 0.9                                               |
|         |           | Yes                          | 1.1                                                     | 0.2                                               |
|         | 75+       | No                           | 1.2                                                     | 0.4                                               |
|         |           | Yes                          | 0.3                                                     | 0                                                 |
